# Supplementary material
Source: MDPI journal article supplement (https://www.mdpi.com/2504-2289/4/4/26)
Supplement: s1 [file s1]

| Reference             | Output Device | Modus  | Visual Display  | Software                                                | Game Engine | Georeferencing | Multi-User |
|-----------------------|---------------|--------|-----------------|---------------------------------------------------------|-------------|----------------|------------|
| Liao [27]             | Desktop       | seated | Monitor         | Rich Internet Application<br>IIS Server<br>SQL Database | Unity 3D    | yes            | yes        |
| Altaweel et. al. [28] | Desktop       | seated | Monitor         | Geoscope<br>ESRI CityEngine<br>Xearth                   | N/A         | N/A            | N/A        |
| Li et. al. [29]       | Desktop       | mobile | Samsung Gear VR | ESRI CityEngine                                         |             |                |            |
| Wu [30]               | Desktop       | wired  | Oculus Rift     | ArcGIS Online Cloud                                     | Web VRGIS   | yes            | yes        |
| Boulos et. al. [10]   | Desktop       |        |                 |                                                         |             |                |            |
