# Supplementary material
Source: MDPI journal article supplement (https://www.mdpi.com/2504-2289/4/4/26)
Supplement: s1 [file s1]

Archive with 9 entries (9 files):
- BDCC-929115_Table_01_Interactive_xR-Applications.pdf
- BDCC-929115_Table_01_Interactive_xR-Applications.xls
- BDCC-929115_Table_01_Interactive_xR-Applications_01.jpg
- BDCC-929115_Table_02_MobileVRApplications.pdf
- BDCC-929115_Table_02_MobileVRApplications.xls
- BDCC-929115_Table_02_MobileVRApplications_01.jpg
- BDCC-929115_Table_03_NonImmersiveDesktopApplications.pdf
- BDCC-929115_Table_03_NonImmersiveDesktopApplications.xls
- BDCC-929115_Table_03_NonImmersiveDesktopApplications_01.jpg
