# Supplementary material
Source: MDPI journal article supplement (https://www.mdpi.com/2504-2289/4/4/26)
Supplement: s1 [file s1]

| Reference              | Output Device | Modus     | Visual Display  | Software      | Game Engine      | Georeferencing | Multi-User |
|------------------------|---------------|-----------|-----------------|---------------|------------------|----------------|------------|
| El Halabi et. al. [25] | mobile        | Ergonomic | Samsung Gear VR | ArcGIS Online | ESRI City Engine | yes            | yes        |
| Li, Lv et. al. [26]    | mobile        | N/A       | Samsung Gear VR | ArcMap        | Web VRGIS        | yes            | yes        |
|                        |               |           |                 | N/A           |                  |                |            |
