# Supplementary material
Source: MDPI journal article supplement (https://www.mdpi.com/2504-2289/4/4/26)
Supplement: s1 [file s1 › BDCC-929115_Table_01_Interactive_xR-Applications.pdf]

| Reference             | Output Device | Modus             | Visual Display     | Software                | Game Engine               | Georeferencing | Multi-User    |
|-----------------------|---------------|-------------------|--------------------|-------------------------|---------------------------|----------------|---------------|
| Caravaca et. al. [15] | wired         | Room Scale VR     | HTC Vive           | N/A                     | Unity 3D (?)              | yes            | yes           |
| Ma et. al. [16]       | wired         | Room Scale VR     | HTC Vive           | Google Street View      | Symmetry                  |                |               |
|                       | mobile        |                   | Samsung Gear VR    | Java Script API         | Sketch Up                 |                |               |
| Berger and Bill [17]  | wired         | seated            | Oculus Go          | AutoCAD                 | ArcMap                    | yes            | N/A           |
|                       |               |                   |                    | N/A                     | Unity 3D                  |                |               |
|                       |               |                   |                    | Bing Maps               | Mapbox                    | N/A            | N/A           |
| Wang et. al. [18]     | mobile        | Augmented Reality | Microsoft Hololens | Open Street Map         | Unity 3D                  | yes            | N/A           |
|                       |               |                   |                    | MRTK                    | Visual Studio             |                |               |
|                       |               |                   |                    | Bing Maps               |                           |                |               |
| Bekele [19]           | mobile        | Augmented Reality | Microsoft Hololens | Google Maps             | Unity 3D                  | yes            | Spatial Query |
|                       |               |                   |                    | ESRI CityEngine         |                           |                |               |
|                       |               |                   |                    | ArcGIS, FME             | Unity 3D                  |                |               |
| Simon [20]            | mobile        | Mixed Reality     | Smartphone         | Global Mapper           | Vuforia                   | no             | N/A           |
|                       |               |                   | Tablet             | QGIS                    |                           |                |               |
|                       |               |                   |                    | Substance Designer      |                           |                |               |
| Secci et. al. [21]    | wired         | seated            | Oculus Rift        | 3DS MAX                 | Unreal Engine             | N/A            | N/A           |
|                       | mobile        |                   | HTC Vive           |                         | Unity 3D                  |                |               |
| Bruno et. al. [22]    | wired         | Room Scale VR     | Tablet Controller  | N/A                     | Web-based Scene Editor    | N/A            | N/A           |
|                       |               | Mixed Reality     | Oculus Rift        |                         |                           |                |               |
| Li et. al. [23]       | wired         | seated            | Projective AR      | ArcGIS                  | Web VRGIS                 | yes            | yes           |
|                       |               |                   |                    | Meshmoon Platform using | OGRE 3D                   |                |               |
| Virtanen et. al. [24] | N/A           | VR Environment    | CAVE               | realXtend Tundra (TXML) | Open Asset Import Library | yes            | yes           |
