# Supplementary material
Source: MDPI journal article supplement (https://www.mdpi.com/2504-2289/4/4/26)
Supplement: s1 [file s1 › BDCC-929115_Table_02_MobileVRApplications.xls]

## Sheet: Sheet1
Reference	Output Device	Modus	Visual Display	Software	Game Engine	Georeferencing	Multi-User
El Halabi et. al. [25]	mobile	Ergonomic	Samsung Gear VR	ArcGIS Online ArcMap	ESRI City Engine	yes	yes
Ma et. al. [16]	wired	Room Scale VR	HTC Vive	Google Street View Java Script API AutoCAD	Symmetry Sketch Up ArcMap	yes	N/A
Berger and Bill [17]	mobile wired	seated	Samsung Gear VR Oculus Go	N/A	Unity 3D Mapbox	N/A	N/A
Wang et. al. [18]	mobile	Augmented Reality	Microsoft Hololens	Bing Maps Open Street Map	Unity 3D Visual Studio	yes	N/A
Bekele [19]	mobile	Augmented Reality	Microsoft Hololens	MRTK Bing Maps Google Maps	Unity 3D	yes	Spatial Query
Simon [20]	mobile	Mixed Reality	Smartphone Tablet	ESRI CityEngine ArcGIS, FME Global Mapper	Unity 3D Vuforia	no	N/A
Secci et. al. [21]	wired	seated	Oculus Rift	QGIS Substance Designer 3DS MAX	Unreal Engine	N/A	N/A
Bruno et. al. [22]	mobile wired	Room Scale VR	HTC Vive Tablet Controller	N/A	Unity 3D Web-based Scene Editor	N/A	N/A
Li et. al. [23]	wired	Mixed Reality seated	Oculus Rift Projective AR	ArcGIS	Web VRGIS	yes	yes
Li, Lv et. al. [26]	mobile	N/A	Samsung Gear VR	N/A	Web VRGIS	yes	yes
