# Supplementary material
Source: MDPI journal article supplement (https://www.mdpi.com/2504-2289/4/4/26)
Supplement: s1 [file s1 › BDCC-929115_Table_03_NonImmersiveDesktopApplications.xls]

## Sheet: Sheet1
Reference	Output Device	Modus	Visual Display	Software	Game Engine	Georeferencing	Multi-User
Liao [27]	Desktop	seated	Monitor	Rich Internet Application IIS Server SQL Database	Unity 3D	yes	yes
Altaweel et. al. [28]	Desktop	seated	Monitor	Geoscope ESRI CityEngine Xearth	N/A	N/A	N/A
Li et. al. [29]	Desktop	seated	Monitor	Geoscope ESRI CityEngine Xearth	Unity 3D Mapbox	N/A	N/A
Wu [30]	Desktop	seated	Monitor	Geoscope ESRI CityEngine Xearth	Unity 3D Visual Studio	yes	N/A
Boulos et. al. [10]	mobile	Augmented Reality	Microsoft Hololens	MRTK Bing Maps Google Maps	Unity 3D	yes	Spatial Query
Simon [20]	mobile	Mixed Reality	Smartphone Tablet	ESRI CityEngine ArcGIS, FME Global Mapper	Unity 3D Vuforia	no	N/A
Secci et. al. [21]	wired	seated	Oculus Rift	QGIS Substance Designer 3DS MAX	Unreal Engine	N/A	N/A
Bruno et. al. [22]	mobile wired	Room Scale VR	HTC Vive Tablet Controller	N/A	Unity 3D Web-based Scene Editor	N/A	N/A
Li et. al. [23]	wired	Mixed Reality seated	Oculus Rift Projective AR	ArcGIS	Web VRGIS	yes	yes
Boulos et. al. [10]	Desktop	mobile wired	Samsung Gear VR Oculus Rift	ESRI CityEngine ArcGIS Online Cloud	Web VRGIS	yes	yes
