# Supplementary material
Source: MDPI journal article supplement (https://www.mdpi.com/2504-2289/4/4/26)

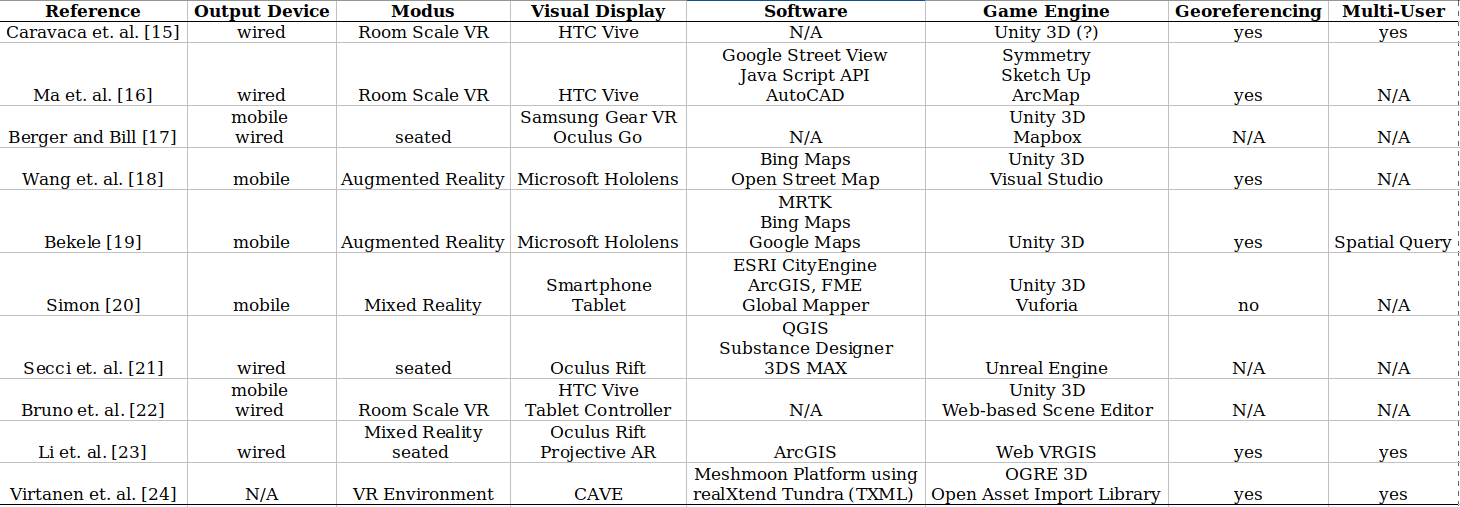

Supplement: s1 [file s1 › BDCC-929115_Table_01_Interactive_xR-Applications_01.jpg]

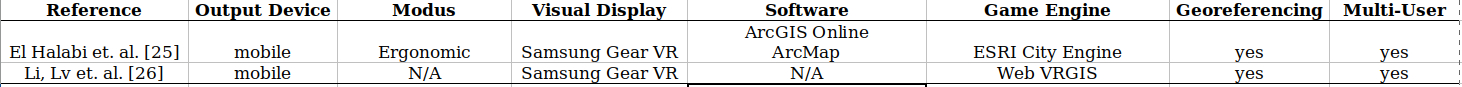

Supplement: s1 [file s1 › BDCC-929115_Table_02_MobileVRApplications_01.jpg]

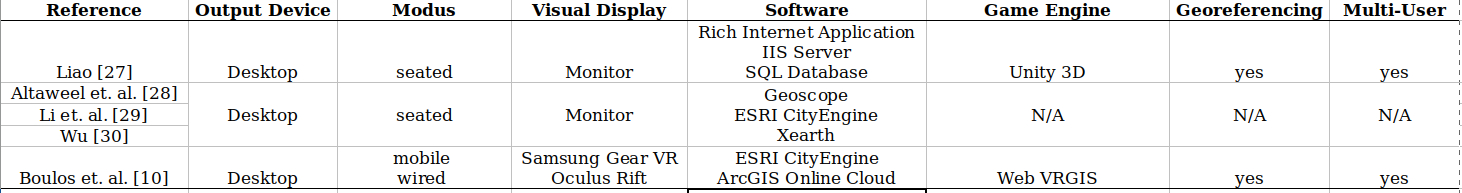

Supplement: s1 [file s1 › BDCC-929115_Table_03_NonImmersiveDesktopApplications_01.jpg]
